# Supplementary material
Source: MDPI journal article supplement (https://www.mdpi.com/2079-6412/9/7/454)

# Supplementary Materials: Surface Modification of Hemoglobin-Based Oxygen Carriers Reduces Recognition by Haptoglobin, Immunoglobulin, and Hemoglobin Antibodies

Ausanai Prapan <sup>1,2</sup>, Nittiya Suwannasom <sup>1,3</sup>, Chiraphat Kloypan <sup>1,4</sup>, Saranya Chaiwaree <sup>1,5</sup>, Axel Steffen <sup>1</sup>, Yu Xiong <sup>1</sup>, Ijad Kao <sup>1</sup>, Axel Pruß <sup>1</sup>, Radostina Georgieva <sup>1,6</sup> and Hans Bäuml <sup>1,\*</sup>

<sup>1</sup> Institute of Transfusion Medicine, Charité-Universitätsmedizin Berlin, 10117 Berlin, Germany

<sup>2</sup> Department of Radiological Technology, Faculty of Allied Health Sciences, Naresuan University, Phitsanulok 65000, Thailand

<sup>3</sup> Division of Biochemistry and Nutrition, School of Medical Sciences, University of Phayao, Phayao 56000, Thailand

<sup>4</sup> Division of Clinical Immunology and Transfusion Sciences, School of Allied Health Sciences, University of Phayao, Phayao 56000, Thailand

<sup>5</sup> Department of Pharmaceutical Technology, Faculty of Pharmacy, Payap University, Chiang Mai 50000, Thailand

<sup>6</sup> Department of Medical Physics, Biophysics and Radiology, Medical Faculty, Trakia University, Stara Zagora 6000, Bulgaria

\* Correspondence: hans.baemler@charite.de; Tel.: +49-30-450-525-131

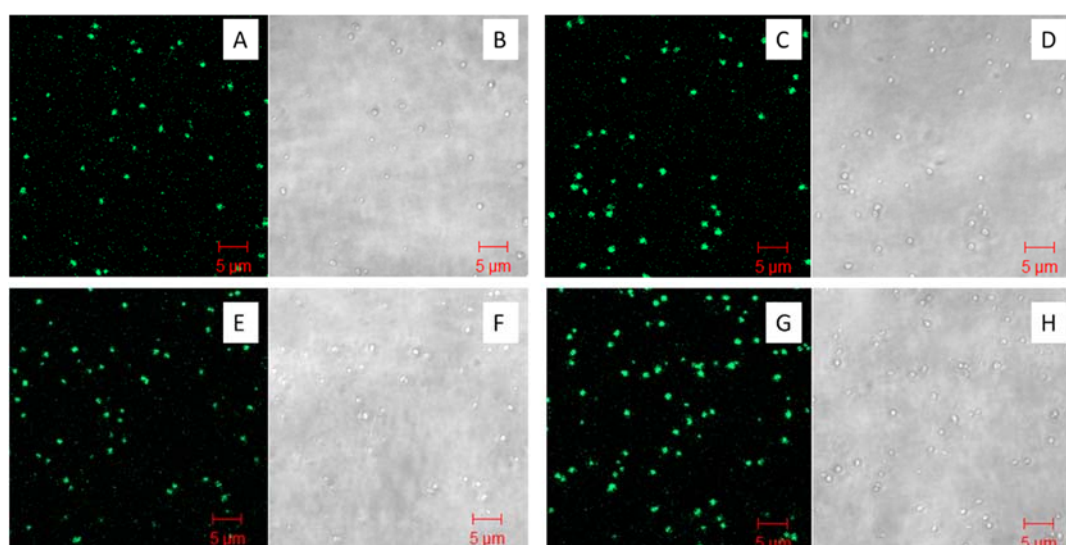

**Figure S1.** Confocal laser scanning micrograph of HA-d-HbMP (A,B), Plu-d-HbMP (C,D), HA-t-HbMP (E,F) and Plu-t-HbMP (G,H) in fluorescence mode (left) and transmission mode (right) (Scale bar: 5  $\mu$ m).

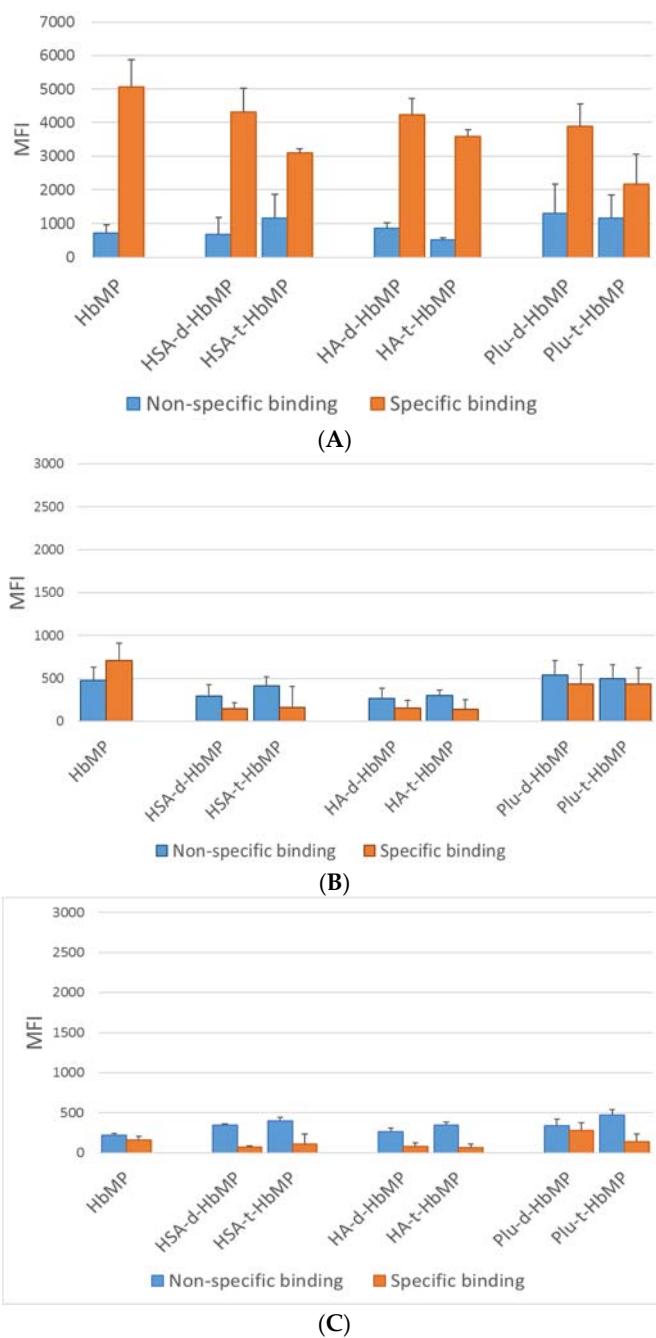

**Figure S2.** The mean fluorescence intensity (MFI) of non-specific and specific binding of Anti-Hb antibodies (A), IgG (B) and Haptoglobin (C) in each surface-modified HbMP was shown. Specific antibodies binding value was calculated by subtracting the non-specific binding from total binding. Data represent the mean  $\pm$  SD and asterisks indicated the significance of differences when compared to HbMP (\* $p < 0.05$ ).

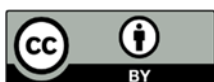

Supplement: s1 [file s1]
